# Supplementary material for: Decreased percentage of CD4+Foxp3+TGF-β+ and increased percentage of CD4+IL-17+ cells in bronchoalveolar lavage of asthmatics
Source: PubMed Central journal article supplement (PMC4133956; doi:10.1186/1476-9255-11-22), 2014-08-09

**Fig S1A**

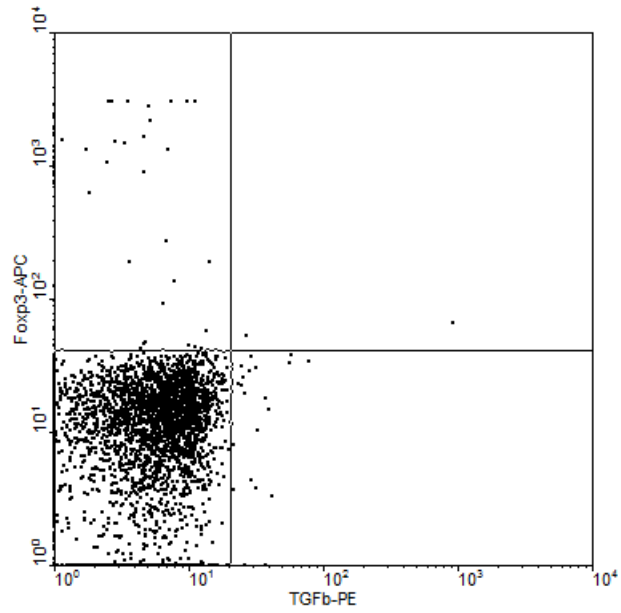

**Fig S1B**

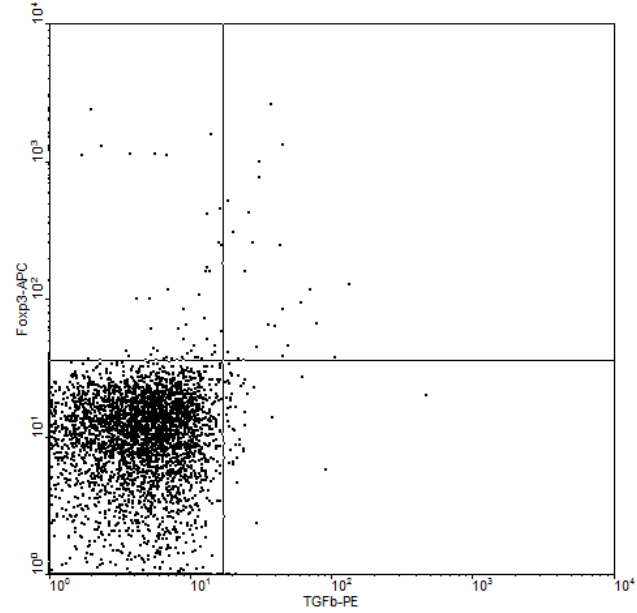

**Fig S1C**

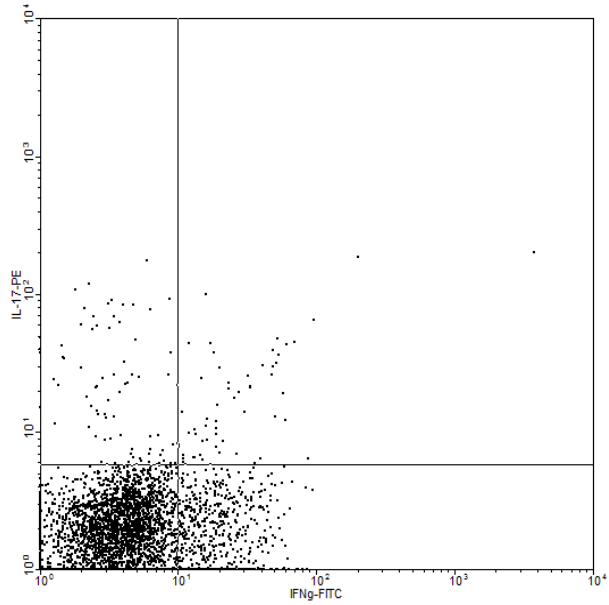

**Fig S1D**

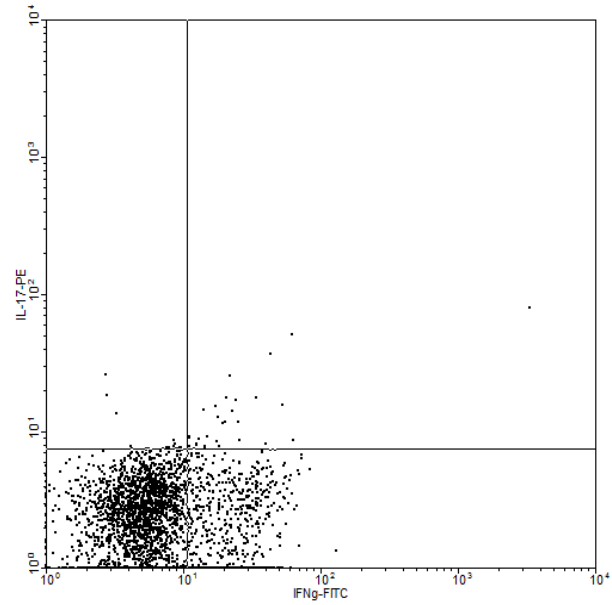

Supplement: 1476-9255-11-22-S1.pdf [file 1476-9255-11-22-S1.pdf]
